# Supplementary material
Source: PubMed Central journal article supplement (PMC1794701)
Supplement: 7400828-s1.pdf [file 7400828-s1.pdf]

## Supplementary methods

**Protein expression and purification.** His<sub>10</sub>-Tim21 (residues 103-239) (Chacinska *et al*, 2005) was treated with subtilisin for 1 h at 4°C and stable fragments were analyzed by SDS-PAGE and ESI-MS (SCIEX API 165 single quadrupole mass spectrometer (Perkin Elmer) equipped with a Nucleosil C8-HD reverse phase column (Macherey & Nagel)). Tim21<sub>IMS</sub> (103-225) was amplified by PCR and ligated into pPROEXHTa (Invitrogen) to allow expression of a fusion protein with cleavable N-terminal His-tag. BL21(DE3) RIL cells (Stratagene) were grown in TB medium containing ampicillin and chloramphenicol. After addition of 1 mM isopropyl-1-thio-β-D-galactopyranoside (IPTG) at OD<sub>600</sub> of 1.5, His-tagged Tim21<sub>IMS</sub> was expressed at 37°C. Cells were harvested after 5 h, suspended in buffer A (50 mM NaH<sub>2</sub>PO<sub>4</sub>, 300 mM NaCl, 10 mM imidazole, pH 8) and lysed using a French press. The soluble fraction was loaded on Ni-NTA-agarose and Tim21<sub>IMS</sub> eluted with buffer B (buffer A containing 250 mM imidazole). After dialysis against 20 mM Tris, 100 mM NaCl, pH 8, the solution was treated with TEV protease and passed over Ni-NTA-agarose. The flow-through was collected and further purified by gel filtration using a Superdex 75 column. Fractions containing Tim21<sub>IMS</sub> were desalted and concentrated to 90 mg/ml. Due to the cloning vector used residues GAMG remained at the N-terminus uncut. The SeMet derivative was expressed essentially the same way as the native protein according to standard protocols. The purified SeMet protein was concentrated to 26 mg/ml. ESI-MS exhibited a single peak at 14923 Da (calculated mass 14922 Da), confirming a full SeMet incorporation.

GST-Tom22<sub>IMS</sub> (120-152) was expressed and purified as described (Chacinska *et al*, 2005). For cleavage of the GST tag, GST-Tom22<sub>IMS</sub> was dialyzed against PBS and treated with thrombin (4 units per mg GST-Tom22<sub>IMS</sub>) at room temperature overnight. Tom22<sub>IMS</sub> was isolated by gel filtration using a Superdex 75 column.

**Peptide scan analysis.** Cellulose-bound peptide scans were generated by automated spot synthesis (Landgraf *et al*, 2004). Analysis of the peptide scan was performed essentially as described (Brix *et al*, 1999, 2000). To analyze binding of Tim21 to

Tom22, the prepared peptide membrane was incubated with 250 nM intermembrane space domain of Tim21 (Chacinska *et al*, 2005) in binding buffer (100 mM KCl, 5% (w/v) sucrose, 0.05% Tween 20, 0.05% (w/v) bovine serum albumin, 30 mM Tris-HCl, pH 7.6) for 60 min at 25°C with gentle shaking. After washing the peptide-bound protein was electro-transferred onto polyvinylidene difluoride membrane using a semidry blotter as described (Brix *et al*, 1999, 2000). The membrane was analyzed by Western-blotting with anti-Tim21 antibodies, a fluorescence blotting substrate (ECF, GE Healthcare), and a fluorescence scanning system (STORM, GE healthcare). For quantification and subtraction of the local background for each peptide spot, the program Imagequant (GE Healthcare) was used. For correlation of the peptide binding values with the primary structure, the values for peptides containing a given amino acid were added and divided by the number of peptides (typically 6 – 7 different peptides/amino acid), yielding normalized units (Brix *et al*, 1999).

**Peptide competition analysis.** The intermembrane space domain of Tim21 (aa 103-239) was bound to Ni-NTA-Sepharose as described (Chacinska *et al*, 2005). After washing the domain was preincubated with P3 and P3<sub>AA</sub> (P3 Asp131Ala, Asp135Ala) peptides in the presence of 50 mM NaCl for 30 min. Mitochondria were solubilized in buffer containing 20 mM HEPES, pH 7.5, 140 mM NaCl, 10% glycerol, 20 mM imidazole and 0.5 % (w/v) Triton-X100. Mitochondrial extracts were incubated with immobilized Tim21 in the presence or absence of P3 and P3<sub>AA</sub>. After washing elution fractions were analyzed by SDS-PAGE and immunodecoration with the antibodies against Tom40 and Tim23.

## REFERENCES

- Brix J, Rüdiger S, Bukau B, Schneider-Mergener J, Pfanner N (1999) Distribution of binding sequences for the mitochondrial import receptors Tom20, Tom22, and Tom70 in a presequence-carrying preprotein and a non-cleavable preprotein. *J Biol Chem* **274**: 16522-16530
- Brix J, Ziegler GA, Dietmeier K, Schneider-Mergener J, Schulz GE, Pfanner N (2000) The mitochondrial import receptor Tom70: identification of a 25 kDa core domain with a specific binding site for preproteins. *J Mol Biol* **303**: 479-488
- Chacinska A, Lind M, Frazier AE, Dudek J, Meisinger C, Geissler A, Sickmann A, Meyer HE, Truscott KN, Guiard B, Pfanner N, Rehling P (2005) Mitochondrial presequence translocase: switching between TOM tethering and motor recruitment involves Tim21 and Tim17. *Cell* **120**: 817-829
- Landgraf C, Panni S, Montecchi-Palazzi L, Castagnoli L, Schneider-Mergener J, Volkmer-Engert R, Cesareni G. (2004) Protein interaction networks by proteome peptide scanning. *PLoS Biol* **2**: e14.

**Supplementary Table 1.** Interactions between  $\alpha$ -helices and other parts of Tim21<sub>IMS</sub> up to 3.5 Å distance using the program "O"

**H-bonds:**

| Helix residue | Interacting residue | Distance (Å) |
|---------------|---------------------|--------------|
| Asp105 OD1    | Ser158 OG           | 2.64         |
|               | N                   | 3.09         |
| Arg111 NH1    | Pro198 O            | 2.84         |
|               | O                   | 2.99         |
| Asp121 OD2    | Tyr213 OH           | 2.68         |
| Arg123 NH2    | Asp130 OD1          | 2.85         |
|               | OD2                 | 2.78         |
|               | NE                  | 2.78         |
|               | NH2                 | 2.84         |
|               | Glu136 O            | 2.84         |

**Hydrophobic interactions:**

| Helix residue | Interacting residue | Distance (Å) |
|---------------|---------------------|--------------|
| Phe109 CE2    | Ile156 CD1          | 3.48         |
|               | CZ                  | 3.48         |
| Ala112 CB     | Met203 CE           | 3.35         |
| Met115 SD     | Phe200 CE2          | 3.49         |
| Asn119 ND2    | Leu215 CD2          | 3.16         |
| Ile122 CD1    | Tyr213 CD2          | 3.49         |

**A**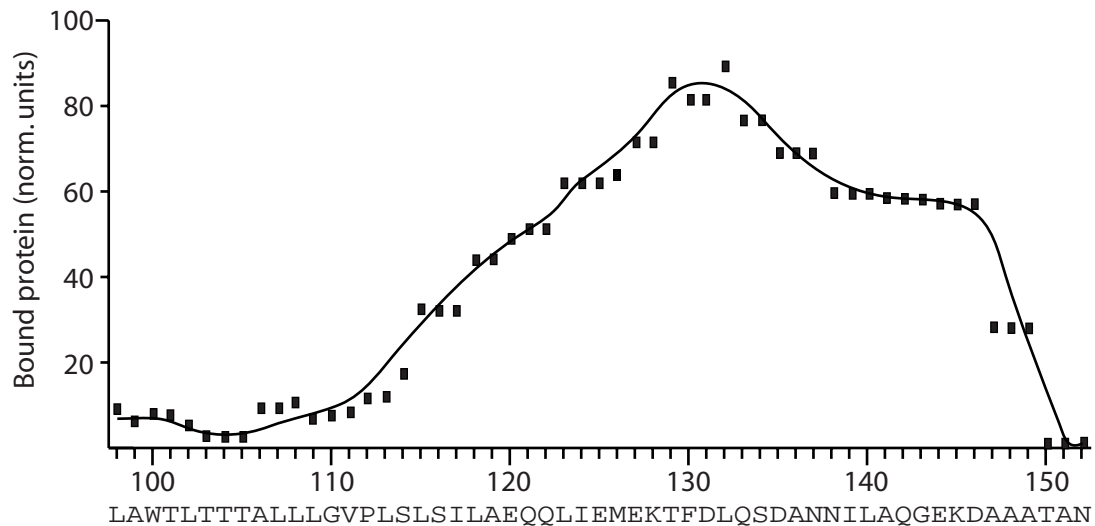**B**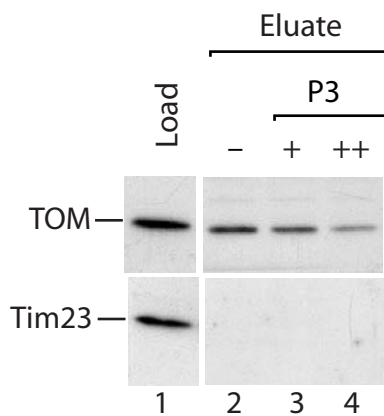**C**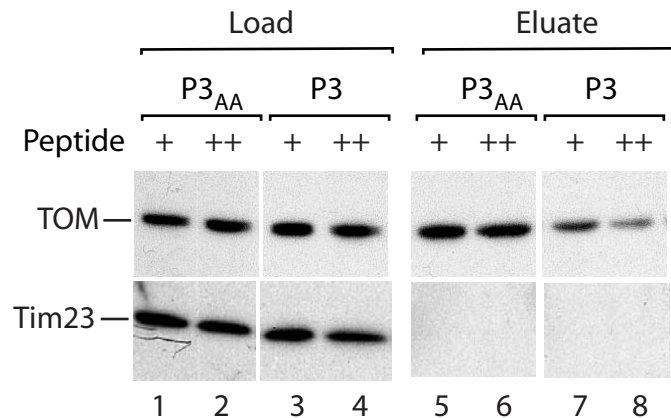

**Supplemental Fig 1** Analysis of the Tom22-Tim21 interaction. **(A)** The purified intermembrane space domain of Tim21 was applied to a Tom22 peptide scan consisting of overlapping 20-mer peptides covalently bound to a cellulose matrix. After washing peptide-bound protein was analyzed by Western blotting with anti-Tim21 antibodies. Signals were quantified and converted to sequence-specific normalized units as described at *EMBO reports* online (<http://www.emboreports.org>). **(B)** The intermembrane space domain of Tim21 was immobilized on Ni-NTA agarose and preincubated in the presence or absence of P3 peptide followed by incubation with solubilized mitochondria in the presence or absence of P3 peptide as described at *EMBO reports* online (<http://www.emboreports.org>). +, 75  $\mu$ M; ++, 100  $\mu$ M peptide. Bound proteins were analyzed by Western-blot analysis using antibodies against Tom40 (TOM) and Tim23. Load, 5%; Eluate, 100% **(C)** Competition of Tom22 binding to the intermembrane space domain of Tim21 by wild-type P3 peptide and the mutant form P3<sub>AA</sub> (P3 Asp131Ala, Asp135Ala) was performed as described under (B). Load, 5%; Eluate, 100%.
